# Supplementary material for: Octyl Methoxycinnamate Modulates Gene Expression and Prevents Cyclobutane Pyrimidine Dimer Formation but not Oxidative DNA Damage in UV-Exposed Human Cell Lines
Source: PubMed Central journal article supplement — Toxicol Sci. 2010 Jan 13;114(2):272–84. doi: 10.1093/toxsci/kfq005 (PMC2840218; doi:10.1093/toxsci/kfq005), 2010-01-13
Supplement: kfq005_2.pdf [file kfq005_2.pdf]

**Supplementary Table 1:** OMC concentration mediated reduction in CIE-weighted UV dose

| UV exposure time<br>(sec) | No OMC                 |                        | OMC (10 ppm)           |                                                           | OMC (27 ppm)           |                                                           | OMC (60 ppm)           |                                                           |
|---------------------------|------------------------|------------------------|------------------------|-----------------------------------------------------------|------------------------|-----------------------------------------------------------|------------------------|-----------------------------------------------------------|
|                           | UV (J/m <sup>2</sup> ) | UV (J/m <sup>2</sup> ) | UV (J/m <sup>2</sup> ) | % remaining<br>UV dose after<br>filtration<br>through OMC | UV (J/m <sup>2</sup> ) | % remaining<br>UV dose after<br>filtration<br>through OMC | UV (J/m <sup>2</sup> ) | % remaining<br>UV dose after<br>filtration<br>through OMC |
| 0                         | 0                      | 0                      | 0                      | 0                                                         | 0                      | 0                                                         | 0                      | 0                                                         |
| 25                        | 6                      | 3                      | 52                     | 2                                                         | 36                     | 1                                                         | 20                     |                                                           |
| 50                        | 12                     | 6                      | 52                     | 4                                                         | 36                     | 2                                                         | 20                     |                                                           |
| 100                       | 25                     | 13                     | 52                     | 9                                                         | 36                     | 5                                                         | 20                     |                                                           |
| 500                       | 123                    | 64                     | 52                     | 45                                                        | 36                     | 24                                                        | 20                     |                                                           |
| 1000                      | 246                    | 128                    | 52                     | 90                                                        | 36                     | 49                                                        | 20                     |                                                           |
