# Supplementary material for: Octyl Methoxycinnamate Modulates Gene Expression and Prevents Cyclobutane Pyrimidine Dimer Formation but not Oxidative DNA Damage in UV-Exposed Human Cell Lines
Source: PubMed Central journal article supplement — Toxicol Sci. 2010 Jan 13;114(2):272–84. doi: 10.1093/toxsci/kfq005 (PMC2840218; doi:10.1093/toxsci/kfq005), 2010-01-13
Supplement: kfq005_3.pdf [file kfq005_3.pdf]

**Supplementary Table 2: Repeated Pair-wise Correlation Analysis of *BestKeeper* (BK) vs. Housekeeping Genes (HKGs)**

**a) GM00498 cell line**

**CT data of housekeeping Genes:**

|                         | <b>18S</b>   | <b>ACTB</b>  | <b>GAPDH</b> |           |
|-------------------------|--------------|--------------|--------------|-----------|
|                         | <b>HKG 1</b> | <b>HKG 2</b> | <b>HKG 3</b> | <b>BK</b> |
| n                       | 60           | 60           | 60           | 60        |
| Geo Mean [CT]           | 15.15        | 22.60        | 23.93        | 20.16     |
| AR Mean [CT]            | 15.15        | 22.62        | 23.93        | 20.16     |
| min [CT]                | 14.12        | 21.32        | 23.20        | 19.36     |
| max [CT]                | 15.98        | 24.17        | 25.10        | 21.01     |
| std dev [ $\pm$ CT]     | 0.38         | 0.89         | 0.29         | 0.46      |
| CV [% CT]               | 2.49         | 3.94         | 1.20         | 2.30      |
| min [x-fold]            | -2.04        | -2.43        | -1.65        | 1.74      |
| max [x-fold]            | 1.79         | 2.97         | 2.26         | 1.81      |
| std dev [ $\pm$ x-fold] | 1.30         | 1.86         | 1.22         | 1.38      |

**Pearson correlation coefficient ( r )**

| vs.                        | HKG 1        | HKG 2        | HKG 3        |  |
|----------------------------|--------------|--------------|--------------|--|
| <b>HKG 2</b>               | <b>0.671</b> | -            | -            |  |
| <b>p-value</b>             | <b>0.001</b> | -            | -            |  |
| <b>HKG 3</b>               | <b>0.503</b> | <b>0.739</b> | -            |  |
| <b>p-value</b>             | <b>0.001</b> | <b>0.001</b> | -            |  |
| <b>BK vs.</b>              | <b>HKG 1</b> | <b>HKG 2</b> | <b>HKG 3</b> |  |
| <b>coeff. of corr. [r]</b> | <b>0.851</b> | <b>0.949</b> | <b>0.790</b> |  |
| <b>p-value</b>             | <b>0.001</b> | <b>0.001</b> | <b>0.001</b> |  |

**b) MCF-7 cell line**

**CT data of housekeeping Genes:**

|                         | <b>18S</b>   | <b>ACTB</b>  | <b>GAPDH</b> |           |
|-------------------------|--------------|--------------|--------------|-----------|
|                         | <b>HKG 1</b> | <b>HKG 2</b> | <b>HKG 3</b> | <b>BK</b> |
| n                       | 60           | 60           | 60           | 60        |
| Geo Mean [CT]           | 16.00        | 21.73        | 23.71        | 20.20     |
| AR Mean [CT]            | 16.00        | 21.74        | 23.71        | 20.20     |
| min [CT]                | 15.25        | 21.22        | 23.32        | 19.81     |
| max [CT]                | 16.65        | 24.16        | 24.32        | 21.38     |
| std dev [ $\pm$ CT]     | 0.26         | 0.37         | 0.20         | 0.23      |
| CV [% CT]               | 1.61         | 1.71         | 0.84         | 1.12      |
| min [x-fold]            | -1.68        | -1.43        | -1.31        | 1.31      |
| max [x-fold]            | 1.57         | 5.40         | 1.53         | 2.27      |
| std dev [ $\pm$ x-fold] | 1.20         | 1.29         | 1.15         | 1.17      |

**Pearson correlation coefficient ( r )**

| vs.                        | HKG 1        | HKG 2        | HKG 3        |  |
|----------------------------|--------------|--------------|--------------|--|
| <b>HKG 2</b>               | <b>0.478</b> | -            | -            |  |
| <b>p-value</b>             | <b>0.001</b> | -            | -            |  |
| <b>HKG 3</b>               | <b>0.323</b> | <b>0.722</b> | -            |  |
| <b>p-value</b>             | <b>0.012</b> | <b>0.001</b> | -            |  |
| <b>BK vs.</b>              | <b>HKG 1</b> | <b>HKG 2</b> | <b>HKG 3</b> |  |
| <b>coeff. of corr. [r]</b> | <b>0.753</b> | <b>0.923</b> | <b>0.761</b> |  |
| <b>p-value</b>             | <b>0.001</b> | <b>0.001</b> | <b>0.001</b> |  |
