# Supplementary material for: Octyl Methoxycinnamate Modulates Gene Expression and Prevents Cyclobutane Pyrimidine Dimer Formation but not Oxidative DNA Damage in UV-Exposed Human Cell Lines
Source: PubMed Central journal article supplement — Toxicol Sci. 2010 Jan 13;114(2):272–84. doi: 10.1093/toxsci/kfq005 (PMC2840218; doi:10.1093/toxsci/kfq005), 2010-01-13
Supplement: kfq005_4.pdf [file kfq005_4.pdf]

**Supplementary Table 3. Comparison of results from treatment of cells, with OMC (27 ppm) alone, OMC plus UV, and UV alone. Treatment groups are listed, together with indications of their associated significant changes, for each gene.**

**\* p<0.05; \*\* p<0.01; \*\*\* p<0.00. ↑ significantly up-regulated genes relative to untreated controls; ↓ significantly down-regulated genes relative to untreated controls**

**a) GM00498 cell line**

| Gene Names | 3h OMC | 6h OMC | 24h OMC | 3h UV | 6h UV | 24h UV | 3h OMC+UV | 6h OMC+UV | 24h OMC+UV |
|------------|--------|--------|---------|-------|-------|--------|-----------|-----------|------------|
| APEX1      |        |        |         |       |       |        |           | * ↑       | ** ↑       |
| MPG        |        |        |         |       |       |        |           |           |            |
| OGG1       |        |        |         |       |       |        |           |           |            |
| DDB1       |        |        |         |       |       |        |           |           |            |
| DDB2       |        |        |         | *** ↑ |       |        |           |           | *** ↑      |
| ERCC1      |        |        |         |       |       |        |           |           |            |
| XPA        |        |        | ** ↓    |       |       |        |           |           |            |
| XPC        |        |        |         |       |       |        |           |           |            |
| CAT        |        |        |         |       |       |        |           |           | ** ↑       |
| SOD1       |        |        |         |       |       |        |           |           |            |
| SOD2       |        |        |         |       |       |        |           |           |            |
| MT1A       |        |        |         |       | *** ↑ | *** ↑  |           |           | *** ↑      |
| MT1B       |        |        | * ↓     |       | *** ↑ | *** ↑  |           |           | *** ↑      |
| TP53       |        |        |         |       |       |        |           |           |            |
| GADD45A    |        |        |         | *** ↑ |       |        |           |           | *** ↑      |
| JUN        |        |        |         | *** ↑ |       |        |           |           | *** ↑      |
| FOS        |        |        |         | *** ↑ |       |        |           |           | *** ↑      |

b) MCF-7 cell line

| Gene Names | 3h OMC | 6h OMC | 24h OMC | 3h UV | 6h UV | 24h UV | 3h OMC+UV | 6h OMC+UV | 24h OMC+UV |
|------------|--------|--------|---------|-------|-------|--------|-----------|-----------|------------|
| APEX1      |        |        |         |       |       |        |           | *** ↑     | *** ↑      |
| MPG        |        |        |         |       |       |        |           |           |            |
| OGG1       |        |        | * ↓     |       |       |        |           |           |            |
| DDB1       |        |        |         |       |       |        |           |           |            |
| DDB2       |        |        |         | *** ↑ |       | * ↑    |           |           | ** ↑       |
| ERCC1      |        |        |         |       |       |        |           |           |            |
| XPA        |        |        | ** ↓    | * ↓   |       |        |           |           |            |
| XPC        |        |        |         |       |       |        |           |           |            |
| CAT        | ** ↓   |        |         |       |       |        |           |           |            |
| SOD1       |        |        |         |       |       |        |           |           | *** ↑      |
| SOD2       |        |        |         |       | *** ↑ | *** ↑  |           |           | ** ↑       |
| MT1A       | *** ↓  | ** ↓   |         | ** ↑  | *** ↑ | *** ↑  | ** ↑      |           | *** ↑      |
| MT1B       |        |        |         |       |       | *** ↑  |           |           | ** ↑       |
| TP53       |        |        |         |       |       |        |           |           |            |
| GADD45A    |        |        |         | ** ↑  |       |        |           |           | ** ↑       |
| JUN        |        |        |         | *** ↑ | * ↑   |        |           |           | *** ↑      |
| FOS        |        |        |         | *** ↑ | * ↑   |        |           | *** ↑     | *** ↑      |
