# Supplementary figures and images for: Octyl Methoxycinnamate Modulates Gene Expression and Prevents Cyclobutane Pyrimidine Dimer Formation but not Oxidative DNA Damage in UV-Exposed Human Cell Lines
Source: PubMed Central journal article supplement — Toxicol Sci. 2010 Jan 13;114(2):272–84. doi: 10.1093/toxsci/kfq005 (PMC2840218; doi:10.1093/toxsci/kfq005), 2010-01-13

Supplementary Figure 1: Endogenous reference gene (HKGs) stability evaluation.

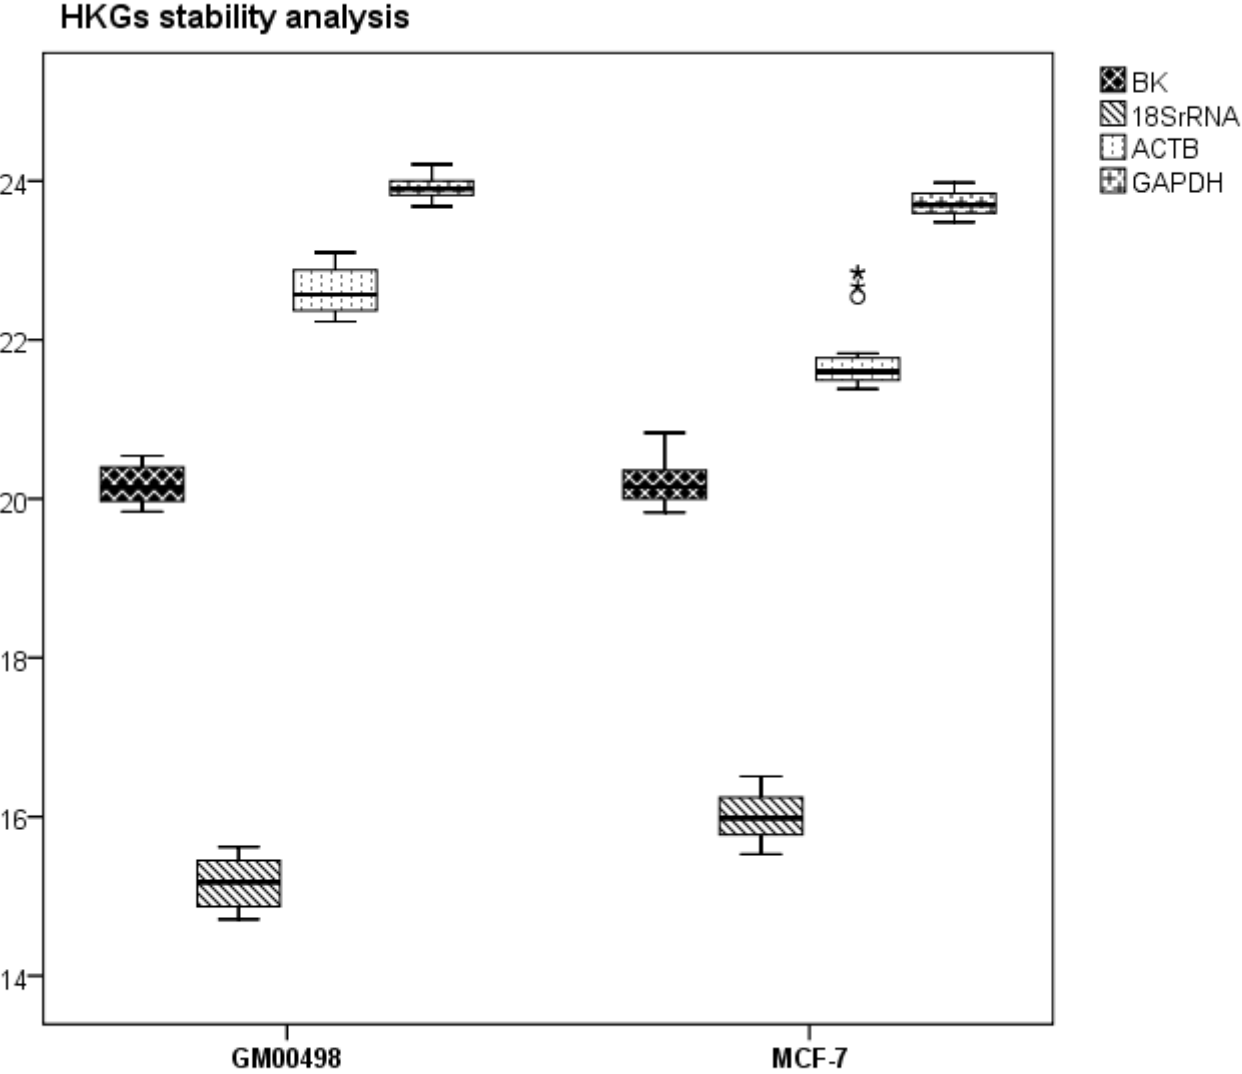

Supplement: kfq005_1.pdf [file kfq005_1.pdf]
